# Supplementary material for: Ipragliflozin Ameliorates Diabetic Nephropathy Associated with Perirenal Adipose Expansion in Mice
Source: MDPI journal article supplement (doi:10.3390/ijms22147329), 2021-07-08
Supplement: s1 [file s1]

## SUPPLEMENTARY MATERIALS AND METHODS

### *Biochemical assays*

Blood glucose levels were measured using a glucometer (One-Touch Verio® IQ; LifeScan Japan Co., Ltd., Tokyo, Japan). Serum total cholesterol, non-esterified fatty acid (NEFA), triglyceride (TG), and 3-hydroxybutyrate (3-HBA) concentrations were determined using the Wako Cholesterol E, NEFA C-Test Wako, TG E-Test Wako (Wako Pure Chemical Industries, Ltd., Osaka, Japan), and beta Hydroxybutyrate Assay Kit (Abcam plc, Cambridge, UK), respectively. Levels of insulin (Morinaga Institute of Biological Science, Inc., Kanagawa, Japan) and leptin (FUJIFILM Wako Shibayagi Co., Gunma, Japan) were measured using enzyme-linked immune sorbent assay kits.

### *Histological analysis*

The kidney and PRAT were fixed with 4% paraformaldehyde, embedded in paraffin, and prepared as slides (4- $\mu$ m sections). PRAT sections were stained with hematoxylin and eosin (HE), whereas kidney sections were stained with periodic acid-Schiff stain (PAS). To measure adipocyte cell size, >250 cells per section were counted using NIH Image J software. Macrophages in the kidney and PRAT were immunohistochemically measured using a rat monoclonal F4/80 antibody (MCA497GA; AbD Serotec, Kidlington, UK). Primary antibody binding was visualized using DAB + chromogen (Dako, Glostrup, Denmark). To evaluate fibrosis, the kidney and PRAT were stained using Sirius red, after which positive areas were measured using NIH Image J software. TUNEL staining of the PRAT was performed using the ApopTag Plus Peroxidase In Situ Apoptosis Detection Kit (Millipore, Billerica, MA, USA) according to the manufacturer's instructions. TUNEL-positive cells were then counted over the entire area of the section. All microscopic images were acquired using the Keyence BZ-9000 microscope.

### *Quantitative reverse transcription polymerase chain reaction*

Total RNA of the kidney and PRAT was isolated using Sepasol reagent (Nacalai Tesque, Inc.). RNA was reverse-transcribed using Random Primer (Thermo Fisher Scientific Inc., Waltham, MA, USA) and ReverTra Ace (Toyobo Co., Ltd., Osaka, Japan). The quantitative reverse transcription polymerase chain reaction was performed using StepOnePlus Real-time PCR System with Fast SYBR Green Master Mix Reagent (Thermo Fisher Scientific Inc.). Primers are listed in the Supplementary Table. Data were normalized to the 36b4 levels and analyzed using the comparative CT method.

### *Western blotting*

Kidney and PVAT were homogenized in lysis buffer (2% sodium dodecyl sulfate, 4 M urea, 1 mM ethylenediaminetetraacetic acid, 150 mM NaCl, 50 mM Tris, pH 8.0). Immunoblotting was performed using phospho-Akt (Ser473) antibody (9271, Cell Signaling Technology, Danvers, MA, USA), total Akt (9272, Cell Signaling Technology), perilipin-1 (3470, Cell Signaling Technology), HMGB1 (6893, Cell Signaling Technology),  $\beta$ -actin (4970, Cell Signaling Technology), phospho-p38 MAPK (Thr180/Tyr182) (4511, Cell Signaling Technology), p38 MAPK (8690, Cell Signaling Technology), and proliferating cell nuclear antigen (PCNA) (ab18197, Abcam, Cambridge, U.K.). Immunoblots were analyzed using ECL Prime Western Blotting Detection Reagent and ImageQuant LAS 4000 mini (GE Healthcare, Little Chalfont, UK).

### *Insulin signaling analysis*

Mice were injected with 5 U/kg of human insulin (Humulin R, Eli Lilly and Company, Indianapolis, IN, USA) via the portal vein after 16 h of fasting. PRAT was then homogenized in lysis buffer, after which immunoblotting was performed using phospho-Akt (Ser473) antibody (9271, Cell Signaling Technology, Danvers, MA, USA) and total Akt (9272, Cell Signaling Technology).

### *Conditioned media collection from perirenal adipose tissue*

Experimental mice (n = 6 in each group) were sacrificed using intraperitoneal pentobarbital anesthesia. Thereafter, PRAT was dissected in Dulbecco's Modified Eagle Medium with 1% penicillin/streptomycin (P/S) and 0.25% bovine serum albumin (BSA). Tissue samples from each mouse were weighed (100 mg), minced 20 times, and then incubated with 1 mL of Dulbecco's Modified Eagle Medium with 1% P/S and 0.25% BSA in 24-well culture plates (Costar, Corning, NY, USA) at 37 °C for 24 h. Conditioned media from PRAT (PRAT-CM) were centrifuged, frozen, and stored at -80 °C until use. Leptin levels in PRAT-CM were determined using the Mouse Leptin ELISA kit (FUJIFILM Wako Shibayagi Co., Gunma, Japan). Cells were incubated with PRAT-CM to evaluate the effects of PRAT-derived leptin on GEC proliferation.

### *Cell culture*

Mouse GECs were obtained from Cell Biologics, Inc. (Chicago, USA). To determine the proliferative effects of PRAT-derived leptin on GECs and the protective effects of Ipra, GECs were cultured in PRAT-CM with or without leptin tA and the p38 MAPK inhibitor SB 203580. Thereafter, GECs were divided into seven groups: SD-CM (incubated with PRAT-CM from mouse fed SD for 48 h), HFD-CM (incubated with PRAT-CM from mouse fed HFD for 48 h), HFD-Ipra-CM (incubated with PRAT-CM from mouse fed HFD-Ipra for 48 h), HFD-CM-SB 203580 (pretreated with 10  $\mu$ M SB203580 for 24 h and then incubated with PRAT-CM from mouse fed HFD for 48 h), HFD-CM-Leptin tA (pretreated with 10  $\mu$ M leptin tA for 24 h and then incubated with PRAT-CM from mouse fed HFD for 48 h), HFD-Ipra-CM-SB 203580 (pretreated with 10  $\mu$ M SB203580 for 24 h and then incubated with PRAT-CM from mouse fed HFD-Ipra for 48 h), and HFD-Ipra-CM-Leptin tA (pretreated with 10  $\mu$ M leptin tA for 24 h and then incubated with PRAT-CM from mouse fed HFD-Ipra for 48 h). Further proof-of-principle studies were performed to determine the concentration-dependent response of GECs to leptin administration with or without the p38 MAPK inhibitor, the PI3K inhibitor, and leptin tA, as indicated in the Results section.

### *Isolation of adipocytes and stromal vascular fraction cells from perirenal adipose tissue*

PRAT was weighed, minced, and digested in 15 mL of collagenase type 2 solution (2 mg/mL, Worthington) for 20 min at 37 °C with gentle shaking. The digestion mixture was centrifuged at 500 g for 3 min. Floating adipocytes were collected for RNA extraction, while pellets containing stromal vascular fraction (SVF) cells were suspended in phosphate-buffered saline. The suspension was passed through a 100- $\mu$ m nylon mesh filter (BD Falcon) and centrifuged at 500 g for 3 min to pellet SVF cells.

### *Flow cytometry*

Isolated SVF cells were resuspended in 200  $\mu$ L phosphate-buffered saline containing 0.25% BSA, 0.2 mM ethylenediaminetetraacetic acid, and 1% penicillin/streptomycin. Cells were preincubated for 7 min at 4 °C in Fc Block (CD16/32, BD Biosciences) and then stained for 15 min with fluorophore-conjugated antibodies at 4 °C. The following antibodies were used: anti-CD45 (clone: 30-F11, BioLegend), anti-F4/80 (clone: BM8, BioLegend), anti-CD11b (clone: M1/70, BioLegend), anti-CD11c (clone: N418, BioLegend), and anti-CD206 (clone: C068C2, BioLegend). Flow cytometric analysis was performed using FACSCantoII (BD Biosciences), while cell sorting was performed using FACSARIAII (BD Biosciences). Data were analyzed using FlowJo software (v9.4.10, Tree Star).

### *Renal vein sampling*

For renal vein sampling, animals were anesthetized, and the right kidney was exposed through a flank incision. After vein clamping, blood samples were collected using a 31-G needle.

**Supplementary Table.** List of primers for qPCR analysis (continued on the next page)

| Gene Product   |    |                           |
|----------------|----|---------------------------|
| <i>Atgl</i>    | Fw | CCACTCACATCTACGGAGCC      |
|                | Rv | GATGCAGAGGACCCAGGAAC      |
| <i>Hsl</i>     | Fw | CGCTACACAAAGGCTGCTTC      |
|                | Rv | AACTGGCGGTCACTGAG         |
| <i>Pck1</i>    | Fw | ATGAAAGGCCGCACCATGTA      |
|                | Rv | GGGCGAGTCTGTCAGTTCAA      |
| <i>Il-15</i>   | Fw | GTCTCCCTAAAACAGAGGCCA     |
|                | Rv | CAGTAACTTTGCAACTGGGATGA   |
| <i>Emr1</i>    | Fw | CTTTGGCTATGGGCTTCCAGTC    |
|                | Rv | GCAAGGAGGACAGAGTTTATCGT   |
| <i>Tnf</i>     | Fw | TCTACTGAACTTCGGGGTGA      |
|                | Rv | CTCCTCCACTTGGTGGTTTG      |
| <i>Adipoq</i>  | Fw | CTCCTGGAGAGAAGGGAGAG      |
|                | Rv | CCTTCAGCTCCTGTCATTCC      |
| <i>Col1a2</i>  | Fw | TTGCAATCGGGATCAGTACGA     |
|                | Rv | CACGTGGTCCTCTGTCTCCAG     |
| <i>Col6a3</i>  | Fw | CTGTGCGCTGCATTCATCC       |
|                | Rv | ACAACCCTCTGCACAAAGTC      |
| <i>Tgfb1</i>   | Fw | GTCACTGGAGTTGTACGGCA      |
|                | Rv | GGGCTGATCCCGTTGATTTC      |
| <i>Lep</i>     | Fw | TCCAGGATGACACCAAAACCC     |
|                | Rv | TGAAGTCCAAGCCAGTGACC      |
| <i>Angptl2</i> | Fw | CACCTACAACCGCATCATCA      |
|                | Rv | TCCATGGACCTGATGGCTTA      |
| <i>Pdgfb</i>   | Fw | CTTCCTCTCTGCTGCTACCT      |
|                | Rv | AGCCCCATCTTCATCTACGG      |
| <i>Nampt</i>   | Fw | CAGTGGCCACAAATTCCAGA      |
|                | Rv | CCTATGCCAGCAGTCTCTTG      |
| <i>ObRa</i>    | Fw | GAAGTCTCTCATGACCACTACAGAT |
|                | Rv | TTGTTTCCCTCCATCAAAATGTAA  |
| <i>ObRb</i>    | Fw | GCATGCAGAATCAGTGATATTGG   |
|                | Rv | CAAGCTGTATCGACACTGATTCTTC |
| <i>Sglt2</i>   | Fw | TTGGTGTTGGCTTGTGGTCT      |
|                | Rv | ATGTTGCTGGCGAACAGAGA      |
| <i>Cd206</i>   | Fw | CTGAAAGGTGACCCTGGCAT      |
|                | Rv | GGTGGATTGTCTTGTGGAGC      |

|               |    |                         |
|---------------|----|-------------------------|
| <i>Ccl2</i>   | Fw | CCACTCACCTGCTGCTACTCAT  |
|               | Rv | TGGTGATCCTCTTGTAGCTCTCC |
| <i>Ccr2</i>   | Fw | ACAAATCAAAGGAAATGGAAGAC |
|               | Rv | TGCCGTGGATGAACTGAGG     |
| <i>Il-6</i>   | Fw | CACTTCACAAGTCGGAGGCT    |
|               | Rv | CTGCAAGTGCATCATCGTTGT   |
| <i>Il-1b</i>  | Fw | CTCCAGCCAAGCTTCCTTGT    |
|               | Rv | TTGGAAGCAGCCCTTCATCT    |
| <i>Fabp4</i>  | Fw | AGACGACAGGAAGGTGAAGA    |
|               | Rv | TAACACATTCCACCACCAGC    |
| <i>Hmgb1</i>  | Fw | CCCGGATGCTTCTGTCAACT    |
|               | Rv | AGCAGACATGGTCTTCCACC    |
| <i>Cd36</i>   | Fw | TGTGGAGCAACTGGTGGATG    |
|               | Rv | CGTGGCCCGGTTCTAATTCA    |
| <i>Fabp1</i>  | Fw | GGGAAAAAGTCAAGGCAGTCG   |
|               | Rv | GACAATGTCGCCCAATGTCA    |
| <i>Srebf1</i> | Fw | ATGCCATGGGCAAGTACACA    |
|               | Rv | ATAGCATCTCCTGCGCACTC    |
| <i>Fas</i>    | Fw | ATTTTGCTGTCAACCATGCC    |
|               | Rv | AGTTGAATCACTCCAACGGG    |
| <i>Ppara</i>  | Fw | GTGCAGCCTCAGCCAAGTT     |
|               | Rv | GTTGGATGGATGTGGCCAGG    |
| <i>Cpt1</i>   | Fw | TGGACCCAAATTGCAGTGGT    |
|               | Rv | GCATCTCCATGGCGTAGTAGT   |
| <i>36b4</i>   | Fw | GGCCCTGCACTCTCGCTTTC    |
|               | Rv | TGCCAGGACGCGCTTGT       |

---

Fw, forward primer; Rv, reverse primer.

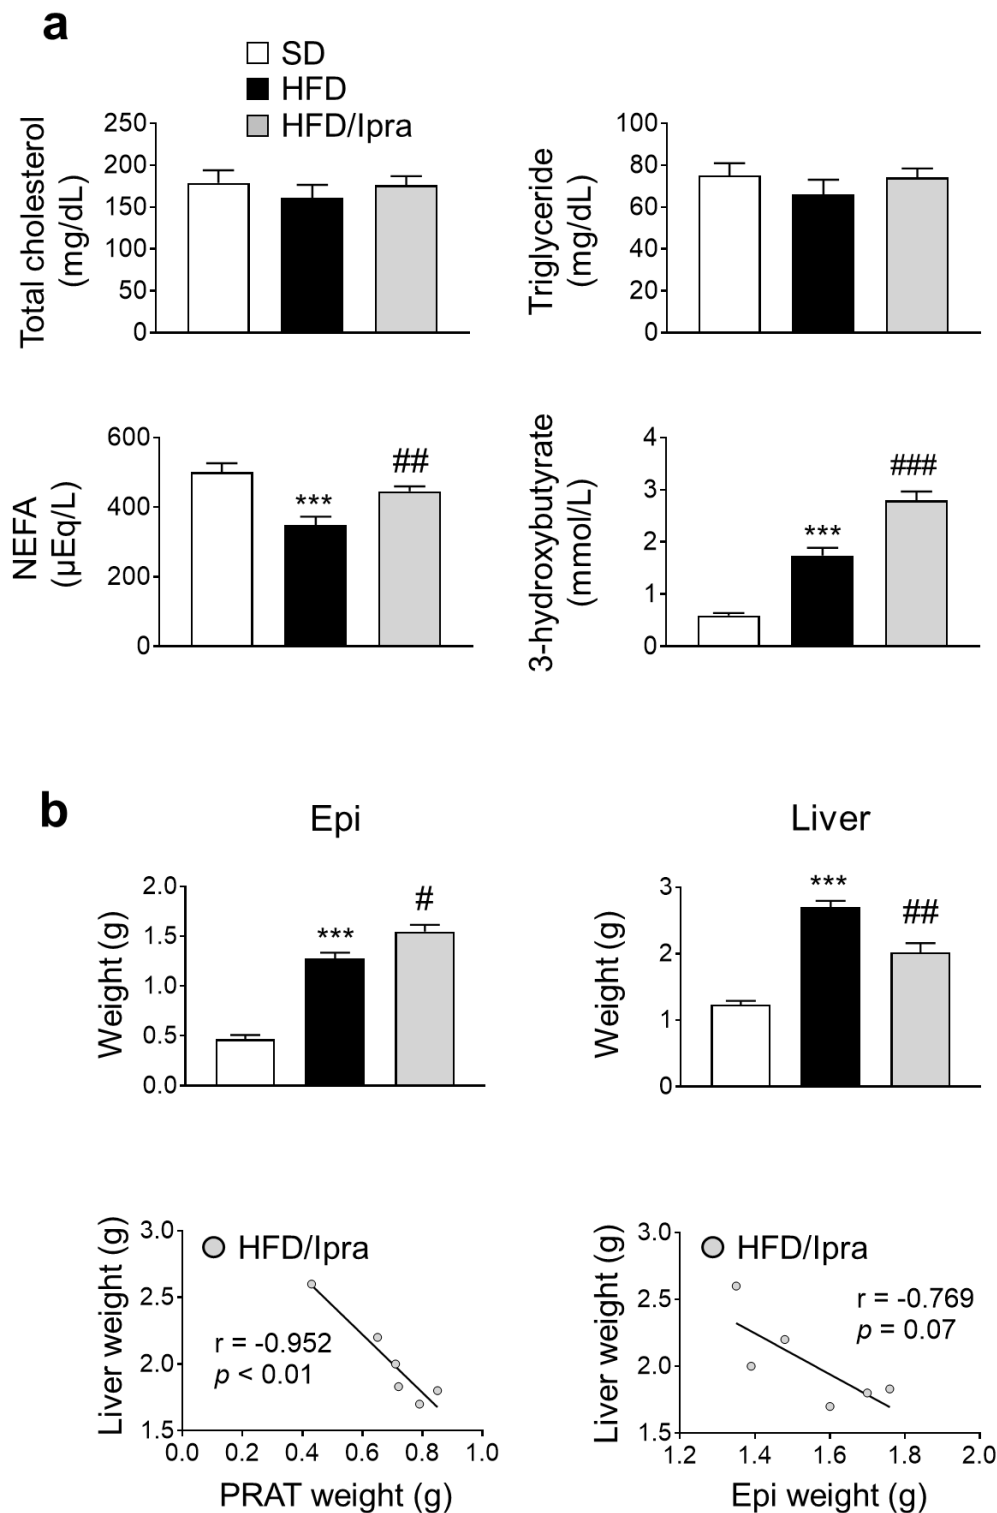

**Supplementary Figure 1. Serum biochemical parameters and organ weights.** (a) Serum lipid profile, 3-hydroxybutyrate concentration, and tissue weight of Epi and liver. (b) Correlation analyses between liver weight and each fat weight, PRAT, and Epi were conducted. Epi, epididymal adipose tissue; PRAT, perirenal adipose tissue. \*\*\* $p < 0.001$  vs. SD. # $p < 0.05$ , ## $p < 0.01$ , ### $p < 0.001$  vs. HFD.  $n = 9-11$  (a)  $n = 6$  (b).

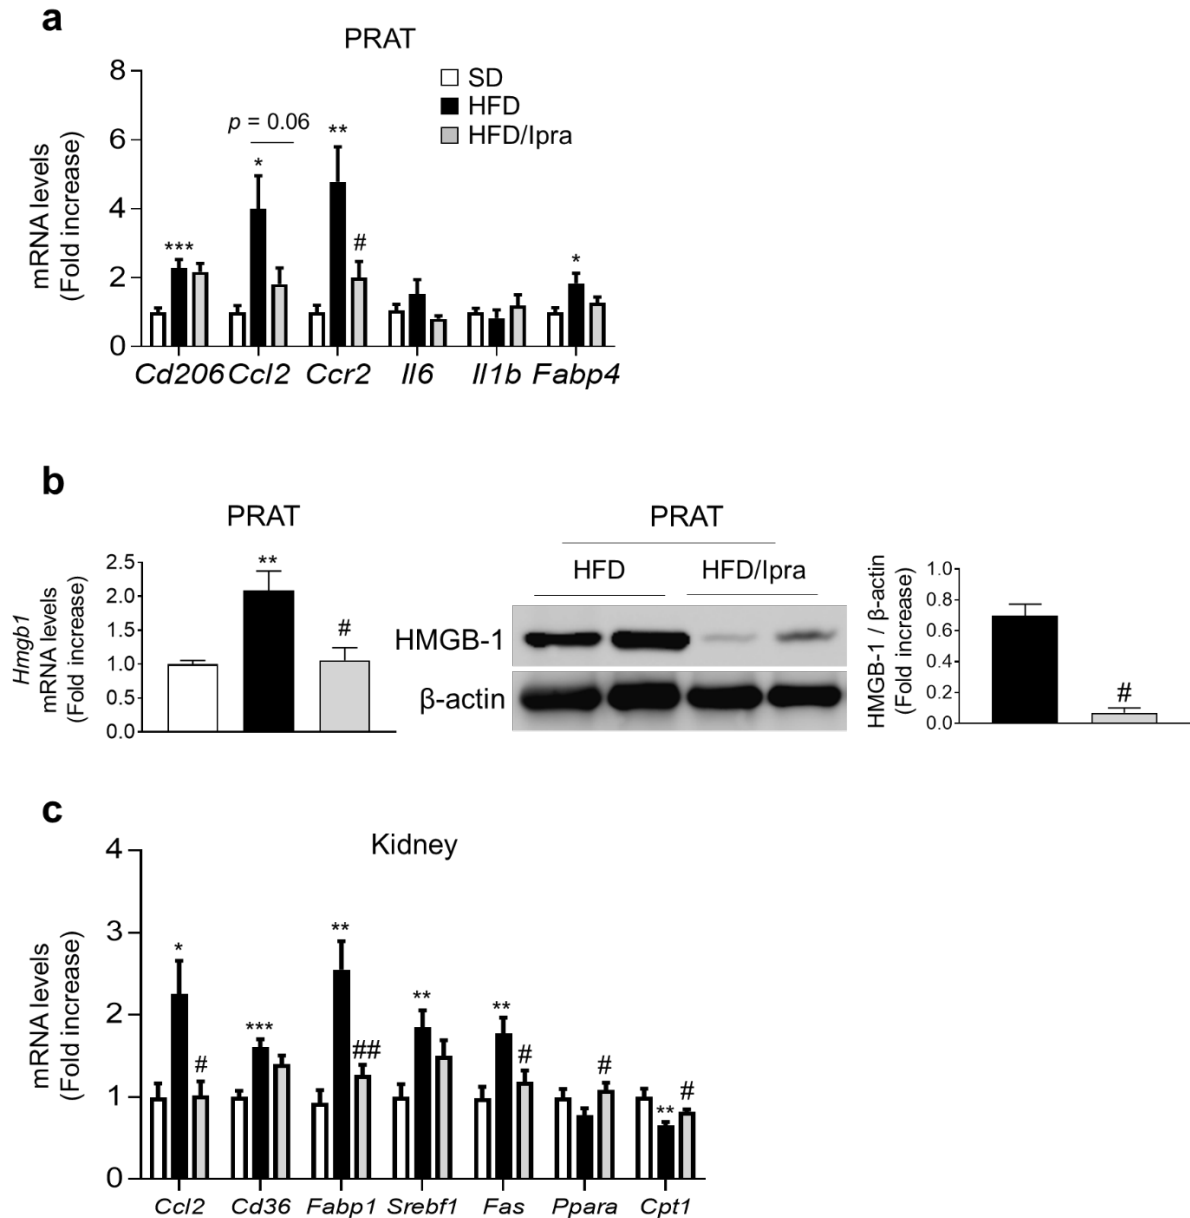

**Supplementary Figure 2. Gene expression in PRAT and kidney.** (a) Expression levels of inflammation-related genes in PRAT SD- or HFD-fed WT mice after 6 weeks of Ipra treatment. (b) Quantitative data of HMGB1 gene expression levels and protein levels in PRAT. (c) Expression levels of inflammation-, fatty acid transport-, fatty acid synthesis-, and lipolysis- related genes in kidney SD- or HFD-fed WT mice after 6 weeks of Ipra treatment. WT, wild-type; SD, standard diet; HFD, high-fat diet; Ipra, ipragliflozin; PRAT, perirenal adipose tissue. \* $p < 0.05$ , \*\* $p < 0.01$ , \*\*\* $p < 0.001$  vs. SD. # $p < 0.05$  vs. HFD.  $n = 6$

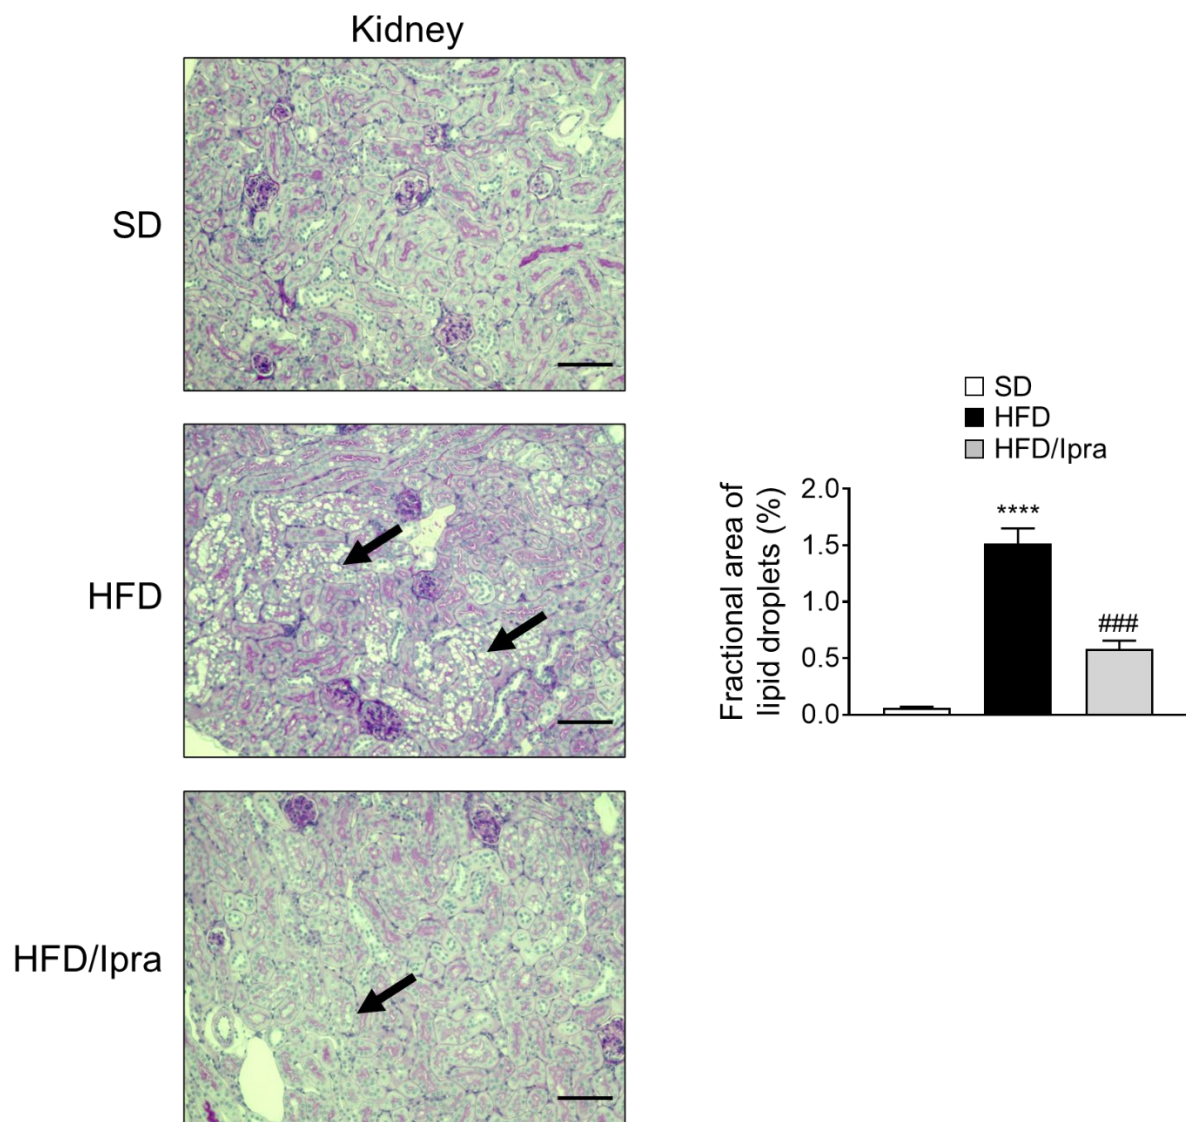

**Supplementary Figure 3. Lipid accumulation in kidney.** Representative images of PAS staining in kidney. Arrows show lipid droplets in renal tubular epithelial cells. Fractional area of lipid droplets was calculated as the ratio of the total amount of lipid droplets area to the whole tissue area. Scale bar, 150  $\mu$ m. \*\*\* $p < 0.001$  vs. SD. ### $p < 0.001$  vs. HFD.  $n = 6$
